# Supplementary material for: The Landlab v1.0 OverlandFlow component: a Python tool for computing shallow-water flow across watersheds
Source: Copernicus journal article supplement (doi:10.5194/gmd-10-1645-2017), 2017-04-20
Supplement: Supplementary file [file gmd-10-1645-2017-supplement-title-page.pdf › gmd-10-1645-2017-supplement-title-page.pdf]

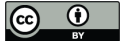

*Supplement of*

## **The Landlab v1.0 OverlandFlow component: a Python tool for computing shallow-water flow across watersheds**

**Jordan M. Adams et al.**

*Correspondence to:* Jordan M. Adams (jadams15@tulane.edu)

- [gmd-10-1645-2017-supplement-title-page.pdf](#)
- [Square Basin - Longer Duration Storm.avi](#)

The copyright of individual parts of the supplement might differ from the CC-BY 3.0 licence.
